# Supplementary material for: Disentangled multi-subject and social behavioral representations through a constrained subspace variational autoencoder (CS-VAE)
Source: bioRxiv or medRxiv preprint supplement (doi:10.1101/2022.09.01.506091), 2023-05-04
Supplement: Supplementary file [file media-1.pdf]

# Disentangled multi-subject and social behavioral representations through a constrained subspace variational autoencoder (CS-VAE)

## 1 Appendix

### 2 A Experimental Methods and Preprocessing for the Multi-Subject Dataset

3 In our work, we employed a subset of the behavioral dataset detailed in Musall et al., 2019 [1]. Briefly, the  
4 task entailed pressing a lever to initiate the task, after which a visual stimulus was displayed towards the left  
5 or the right. After a delay period, the spouts come forward, at which time the mouse makes its decision by  
6 licking the spout corresponding to the direction of the visual stimulus (left or right). Finally, the mice receive  
7 a juice reward if they choose correctly.

8 We tested the CS-VAE on the behavioral data for the four mice performing a visual task, and randomly  
9 chose 388 trials per mouse each of the trial has 189 number of frames. Each frame was pre-processed and  
10 resized to have both the length and width being 128. One example trial for each mouse can be found in  
11 Supplementary Material 1.

12 Before inputting the data into the model, we sorted the trials by the amount of variance in the images,  
13 and shuffled the first half (high variance) and the second half (low variance) of the dataset separately. This  
14 was done to speed up training by training the model on high variance trials first. We tested our model by  
15 randomly choosing 4 trials from all trials for each mouse 5 times. The same procedure was applied when  
16 training the model on the simulation dataset, i.e., the doctored data for one subject.

### 17 B Experimental Methods and Preprocessing for the Freely-Moving Social Be- 18 havior Dataset

19 The dataset consists of a 16-minute video of two adult novel C57BL/6J mice, a female and a male, interacting  
20 in a clean cage. Prior to the recording session the mice were briefly socially isolated for 15 minutes to increase  
21 interaction time. This dataset was collected by one of the authors. The original data has 24917 number of  
22 frames with length and width being 1920 and 1080, respectively. The example fraction of the video can be  
23 found in Supplementary Material 6.

24 The nose, ears, and tail base of each mouse were manually annotated using AlphaTracker. We kept 19659  
25 number of frames that have the labels for preprocessing and training. We perform several preprocessing steps  
26 to align and crop the video as well as the labels based on one of the two mice (Mouse 1, female). All of the  
27 preprocessing steps were based on the AlphaTracker labels. For each frame, we first rotate it to ensure that  
28 the nose and tailbase for Mouse 1 are on the same horizontal line, with the central point for rotation as the  
29 left ear. Next, we aligned the frame such that the left ear of Mouse 1 was at the same location across all  
30 frames. Finally, we resize the frame to be  $128 \times 128$  and consequently the AlphaTracker labels. For this  
31 dataset, since there was a relatively low number of frames, we obtained the CS-VAE MSE and label  $R^2$  for  
32 the entire dataset.

### 33 C Methodological details of the Partitioned Subspace VAE

34 The Partitioned Subspace VAE (PS-VAE) was introduced in [2], and we borrow the notation used in that  
35 paper when detailing the CS-VAE. Thus, we include here a full description of the model.

36 First of all, we define the input frame as  $x$ , and the corresponding pose estimation tracking label as  $y$ .  
37 The reconstructed variables are termed  $\hat{x}$  and  $\hat{y}$ , respectively. The supervised latent space is denoted as  $z_s$ ,

38 unsupervised latent as  $z_u$ , and the background latent as  $z_b$ . In a VAE model, we would like to minimize the  
 39 distance, typically the KL divergence, between the posterior distribution of the latent variables  $p(z|x)$  and a  
 40 chosen distribution  $q(z|x)$ . However, since  $p(z|x)$  is an unknown distribution, the Evidence Lower Bound  
 41 (ELBO) is introduced as an alternative method to reduce the KL divergence:

$$42 \quad \mathcal{L}'_{ELBO} = \mathbb{E}_{q(z|x)}[\log(p(x|z))] - KL[q(z|x)||p(z)] \quad (1)$$

43 Following [2], if we have a finite dataset  $\{x_n\}_{n=1}^N$ , and we treat  $n$  as a random variable with a uniform  
 44 distribution  $p(n)$  while defining  $q(z|n) := q(z_n|x_n)$ , we can rewrite the ELBO as:

$$\mathcal{L}_{ELBO} = \mathbb{E}_{p(n)}[\mathbb{E}_{q(z|n)}[\log(p(x|z))] - \mathbb{E}_{p(n)}[KL[q(z|n)||p(z)]] \quad (2)$$

45 We define the loss over frames  $\mathcal{L}_{frames}$  as the first of the two terms above. In the PS-VAE model, there are  
 46 two inputs: frames  $x$  and labels  $y$ . Therefore, in Equation (2), instead of writing the input likelihood as  
 47  $p(x|z)$ , we can now write it as  $p(x, y|z)$ . A simplifying assumption is made that  $x$  and  $y$  are conditionally  
 48 independent given  $z$ , and thus we can directly write  $\mathcal{L}_{frames+labels}$  as  $\mathcal{L}_{frames} + \mathcal{L}_{labels}$ , where  $\mathcal{L}_{labels}$  is  
 49 calculated by replacing  $x$  with  $y$  in  $\mathcal{L}_{frames}$ .

After assuming the prior  $p(z)$  has a factorized form:  $p(z) = \prod_i p(z_i)$ , the KL term  $\mathcal{L}_{KL}$  can be split as the  
 addition of  $\ell_{KL-s}$  and  $\ell_{KL-u}$ , i.e., the KL terms for the supervised and unsupervised latents, respectively.  
 We decompose the KL term for the unsupervised latent as the following [2].

$$\begin{aligned} \mathcal{L}_{KL-u} &= \mathcal{L}_{ICMI} + \mathcal{L}_{TC} + \mathcal{L}_{DWKL} \\ &= KL[q(z_u, n)||q(z_u)p(n)] + KL[q(z_u)||\prod_j(z_{u,j})] + KL[q(z_{u,j})||\prod_j(z_{u,j})] \end{aligned} \quad (3)$$

50 where  $j$  represents the latent dimension,  $\mathcal{L}_{ICMI}$  is the index-code mutual information, which measures how  
 51 well the latent encodes the corresponding input data. The term TC is short for total correlation, which  
 52 measures the interdependency of each latent dimension. The third term,  $\mathcal{L}_{DWKL}$  is the dimension-wise KL,  
 53 which calculates the KL divergence for each dimension individually. Finally, the resulting subspace is forced  
 54 to be orthogonal by applying orthogonal weights across all the different latents.

55 The authors in [2] introduce an extension to PS-VAE for modeling multi-session data. The Multi-Session  
 56 PS-VAE (MS-PS-VAE) can only work with a labeled set of discrete sessions, as described in the Introduction.  
 57 The images from each session are labeled, and the session-specific latents are enforced to be static over  
 58 time, thus capturing the image-related details. To enforce the background latents to be static over time in a  
 59 particular session, and to maximize the difference in the background latents across different sessions, the  
 60 triplet loss is introduced in MS-PS-VAE. As described in the Introduction, this loss term artificially places  
 61 the latents from the same session together while separating the latents from different sessions. The triplet  
 62 loss is computed as the following.

$$\mathcal{L}_{triplet} = \max\{d(a, p) - d(a, n) + m, 0\} \quad (4)$$

63 Here,  $a$  is the anchor point,  $p$  is the positive point,  $n$  is the negative point, and  $m$  is a margin. The function  
 64 pulls the point  $p$  towards point  $a$ , and pushes the point  $n$  away from point  $a$ . While training, the data from  
 65 multiple sessions is included in each mini-batch. The data from each session is split in three, and each third  
 66 from the same session acts as an anchor and positive point, while the data from another session acts as a  
 67 negative point. Practically, this requires as many sessions as possible in the same mini-batch during the  
 68 training for accurate results. As the number of sessions increases, this method becomes computationally  
 69 intractable, and may lead to unsatisfactory reconstruction results. Moreover, this loss does not allow for  
 70 varying backgrounds across any one session.

71 In the MS-PS-VAE model, the triplet loss was applied as a supervised manner to pull the data from the  
 72 same subject being closer while pushing the different subjects away from each other. This method is only  
 73 useful when the number of sessions is known, and is not applicable in an open-field setting, for example while  
 74 modeling freely-moving social behavior as in this manuscript.

75 Therefore, in this manuscript, we introduce a regularization term that can automatically separate different  
 76 subjects in the background latent space without specifying the number of sessions or labeling each frame as  
 77 belonging to a specific session.

Table 1: Hyperparameter for different dataset

| Dataset          | $\alpha$ | $\beta$    | $\sigma$ | $\gamma$ |
|------------------|----------|------------|----------|----------|
| Various contrast | 1000     | 5          | 5        | 500      |
| Multi-subject    | 1000     | 5          | 15       | 500      |
| Social behavior  | 1200     | <i>N/A</i> | 20       | 200      |

Table 2: Latent dimensions and the prior distribution for different dataset

| Dataset          | supervised | unsupervised | constrained | prior distribution |
|------------------|------------|--------------|-------------|--------------------|
| Various contrast | 5          | 2            | 3           | Swiss roll         |
| Multi-subject    | 5          | 2            | 2           | circle             |
| Social behavior  | 2          | 0            | 3           | hollow cylinder    |

## D Model Architecture and Training

Our computational experiments were carried out using TensorFlow and Keras. The image decoder we use is symmetric to the encoder, with both of them containing 14 convolution layers. We applied the Adam optimizer with learning rate as  $10^{-4}$ . For the multi-subject dataset, we fixed our batch size to be 256 and trained for 50 epochs. For the freely-moving social behavior dataset, we trained for 500 epochs with batch size 128.

## E Choice of Hyperparameters

In the multi-subject dataset, four coefficients need to be decided for the objective function as indicated above:  $\{\alpha, \beta, \sigma, \gamma\}$ . There is a balance between the choice of  $\beta$  and  $\gamma$ : properly choosing the values could separate the latent in the unsupervised space and the latents in both unsupervised and background space as well. A large separation of the background latent may potentially lead to unsatisfactory reconstruction results. The choice of kernel size  $\sigma$  depends on the dataset, and should be larger than the number of distinct groups in our dataset; since in our current experiments, we have at most four groups, we set  $\sigma = 15$ . Moreover, we set  $\alpha$  to 1000,  $\beta$  to 5,  $\gamma$  to 500. We set the dimensionality of the supervised latent space equal to the number of tracked video parts, which is 5 in our case. We set the dimensionality of the unsupervised latent space as 2, while that of the background latent space as 2.

In the social behavior task, we track the nose location as the supervised latent, since the other labels do not have a high variance (due to the alignment process). Additionally, we do not need any unsupervised latents to explain the individual’s behavior. The CS latent in this setting has 3 dimensions. Here,  $\alpha$  is 1200,  $\gamma$  is 200, and the kernel size is 20.

The hyperparameters chosen for all three datasets are shown in Tables 1 and 2.

## F Motif Generation

A switching linear dynamical system (SLDS) consists of discrete latent state  $z_t \in \{1, 2, \dots, K\}$ , continuous latent state  $x_t \in \mathbb{R}^M$ , and the observation state  $y_t \in \mathbb{R}^N$ . Here,  $t = 1, 2, 3, \dots, T$  is the time step,  $T$  is the length of the input signal;  $K$  is the number of discrete states;  $M$  is the number of latent dimensions;  $N$  is the observation dimensions. The discrete latent state  $z_t$  follows the Markovian dynamics with the state transition matrix expressed as:

$$Q_{i,j} = P(z_t = j | z_{t-1} = i) \quad (5)$$

The continuous latent state  $x_t$  has the following linear dynamical relations that determined by  $z_t$ .

$$x_{t+1} = A_{z_{t+1}}x_t + V_{z_{t+1}}u_t + b_{z_{t+1}} + w_t \quad (6)$$

Here,  $A_{z_{t+1}}$  is the dynamic matrix at state  $z_{t+1}$ ;  $u_t$  is the input at time t, with  $V_{z_{t+1}}$  being the control matrix;  $b_{z_{t+1}}$  is the offset vector and  $w_t$  being the noise which is generally the zero mean Gaussian. Here, our

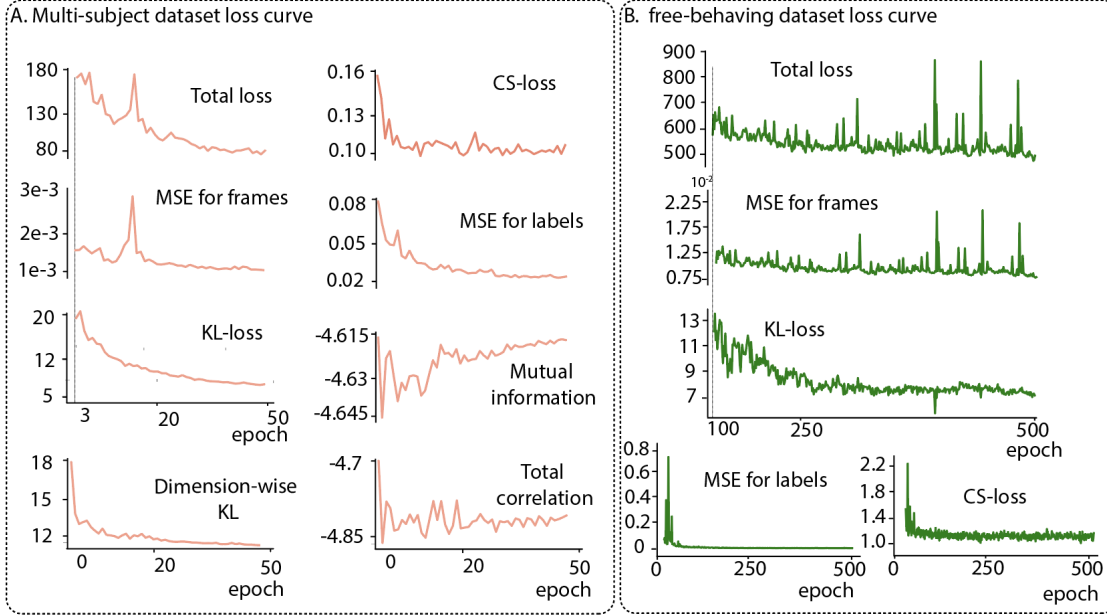

Figure 1: Loss curve for A. training the multi-subject dataset B. training the freely behaving dataset with the specified hyperparameters as in Tables 1 and 2.

108 observation model is in Gaussian case; therefore, the observation  $y_t$  is expressed as:

$$y_t = C_{z_t}x_t + F_{z_t}u_t + d_{z_t} + v_t \quad (7)$$

109 Here,  $C_{z_t}$  is the measurement matrix at state  $z_t$ ;  $F_{z_t}$  is the feedthrough matrix which directly feed the  
 110 input into the observation;  $d_{z_t}$  is the offset vector and  $v_t$  is the noise. Here the update was accomplished by  
 111 the Expectation-Maximization(EM) algorithm. In the E-step, the model updates the hyperparameters. In  
 112 the M-step, the log-likelihood in Eq.7 is being maximized.

113 To implement the SLDS, we adopted the open source software from Linderman et al.[3]. We fit the SLDS  
 114 using different latent dimensions, where the observation dimension was the order of latent dimension and  
 115 the number of states was determined by visualizing the videos. We use SLDS's to model the motifs in the  
 116 multi-subject dataset since the behaviors are well separated using their dynamics. We use K-means to model  
 117 the motifs in the freely-moving social behavior dataset since the behaviors are well separated directly in state  
 118 space. An autoregressive HMM (a simpler model than an SLDS) applied to the CS latents in the social  
 119 behavior dataset leads to similar results as the K-means.

## 120 G Loss Curves

121 We show the learning curve for each loss term for both dataset to precisely quantify the model, in Fig. 1. For  
 122 the multi-subject dataset (Fig. 1A), for the unsupervised latents, the final loss for dimension-wise KL, total  
 123 correlation, and the mutual information are 11.7,  $-4.8$ , and  $-4.6$ , respectively. The final KL loss for the  
 124 supervised latents is 5.06 and the final CSD loss for the CS latents is 0.1. For the free behaving dataset, the  
 125 loss curves for each loss term are shown in Fig. 1B. By the end of the training process, the KL loss for the  
 126 supervised latents is 7.01 and the CSD loss for the CS latents is 1.15.

## 127 H SVM

128 To further quantify the separation of the latents between different subjects, we applied a supervised classifica-  
 129 tion method to decode the identity of the subject using each latent.

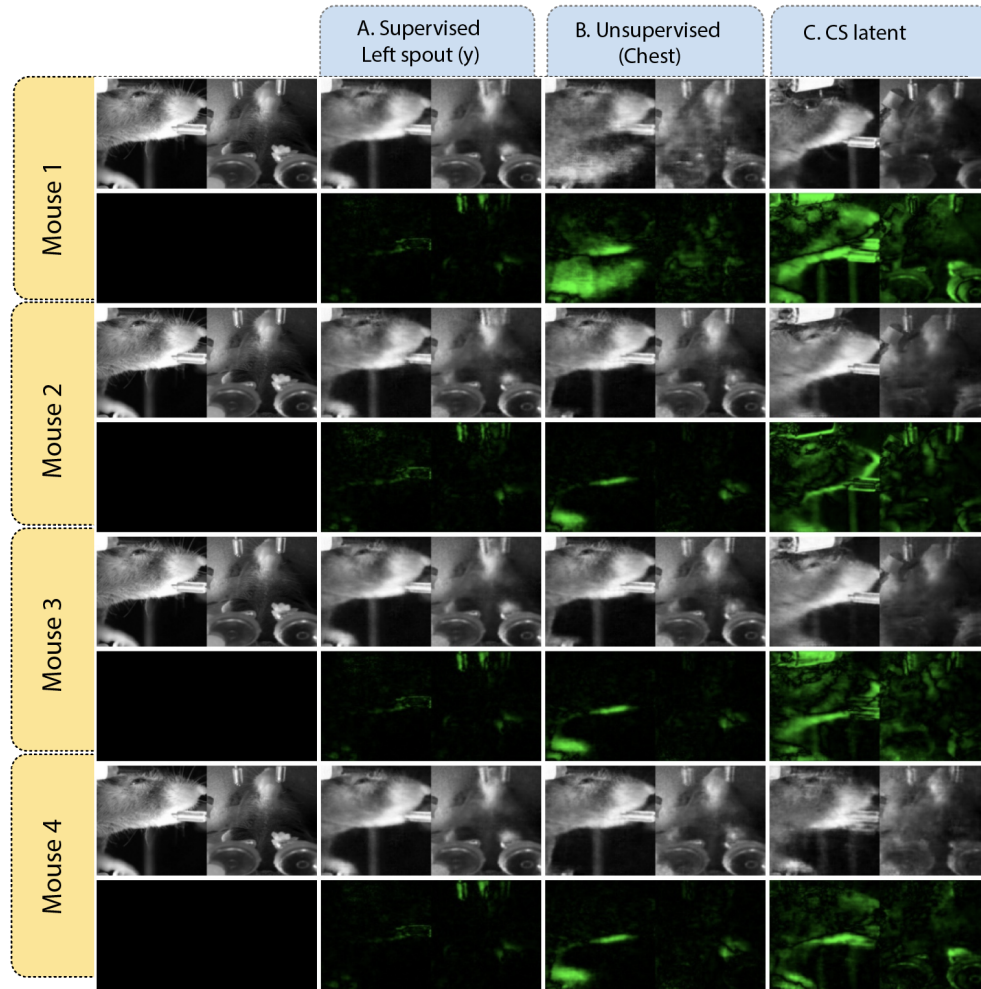

Figure 2: Latent traversals for the multi-subject dataset for the four mice with the same base image A. an example supervised latent, B. an example unsupervised latent, and C. an example CS latent. We see that the same base image (Mouse 3) is transformed into a different mouse each time when changing the CS latent.

130 After randomly shuffling all the latents, we split all the trials into training trials and test trials, with  
 131 each mouse having 368 trials in the training set and 20 trials in the test set, and repeated this 5 times with  
 132 different random seeds.

## 133 I Latent traversal

134 For the multi-subject dataset, we tested the latent traversal with the same base image to validate the results,  
 135 shown in Figure 2. Here, we randomly chose a frame from a mouse and changed each individual latent within  
 136 different ranges as detailed in the Methods. For example, in Figure 2, the first row contains the output  
 137 when the corresponding latent is changed to take on the maximum value from the range of Mouse 1. As in  
 138 the figures in the main text, the upper images are the latent traversal images while the lower ones are the  
 139 difference between the upper image and the original image. We see that the base image from Mouse 3 can be  
 140 flexibly changed to produce a different mouse when changing the CS latent. Moreover, when changing the  
 141 supervised and unsupervised latents for the different mice, Mouse 3 seems to be flexibly changing with these  
 142 latents from different mice.

143 To better visualize the specialization of each latent, we generated the latent traversal videos for each  
 144 latent with different base images. For different mouse, we first of all find the maximum and the minimum

145 value for the specific latent. Then, change the latent within that range with 0.5 per step. Finally, concatenate  
146 all the latent traversal images into videos. The videos can be found in Supplementary Material 3.

147 We performed a similar visualization on the freely-moving social behavior dataset for the CS latents. The  
148 latent traversal videos can be found in Supplementary Material 4, and some clips from the videos are shown  
149 in Fig 3.

## 150 J Neural decoding models

151 The trials were first shuffled and then split into training and testing. Next, we employed the CS-VAE  
152 generated latent, and choose one example subject to decoded the behavior at time  $t$  using the neural activity  
153 recorded between  $t - 0.15s$  and  $t$ . We applied four types of model to compare the performance. A linear  
154 model which directly map the neural activities into the behavior. A multilayer perceptron (MLP) with three  
155 dense layers to train the decoder. We used the Adam optimizer with learning rate decay from 0.1 with 0.3  
156 decay rate for every 5 step. The batch size was fixed to be 150 and trained for 200 epochs. A LSTM model,  
157 which begin with a dense layer followed by a LSTM layer with drop out rate being 0.5 and another dense  
158 layer at the end. We applied the same training strategy as in MLP model.

159 We introduced a model based on transfer learning to perform the decoding test on the previously tested  
160 subject. The rest of the three mice were the input to the original training model. The procedures were similar  
161 as before, after the trials were being shuffled and split, we decoded the behavior directly with the raw neural  
162 activities with the time window being 0.15s. After that, we implemented three perceptron layers for each of  
163 the three mice before the output of which went into a recurrent neural network (RNN). The RNN consisted  
164 of one long short-term memory (LSTM) layer with unit number of 64 and a drop out layer with rate being  
165 0.5. We applied the Adam optimizer with learning rate decay from 0.1 with 0.3 decay rate for every 5 steps.  
166 The batch size was 150 and we trained for 200 epochs. After we finished training the original network, we  
167 transferred the RNN model to the new model which was applied to train for the fourth mouse alone. For the  
168 fourth mouse, the trials were split with different training and testing ratio. After applying the same steps to  
169 the data, the neural activities then went through a new perceptron layer before went through the pre-trained  
170 RNN model. We applied the Adam optimizer with the same learning rate decay procedures as well. We  
171 again, trained for 200 epochs with batch size being 128 this time. The trade-off between accuracy and time  
172 for different models can be found in Tables 3 and 4.

## 173 K Code

174 The code for training the CS-VAE can be found in Supplementary Material 7. The code can be executed by  
175 simply compiling the script ‘train.py’.

## 176 References

177 [1] Musall, S., Kaufman, M. T., Juavinett, A. L., Gluf, S. Churchland, A. K. Single-trial neural dynamics  
178 are dominated by richly varied movements. Nature neuroscience 22, 1677 – 1686 (2019).

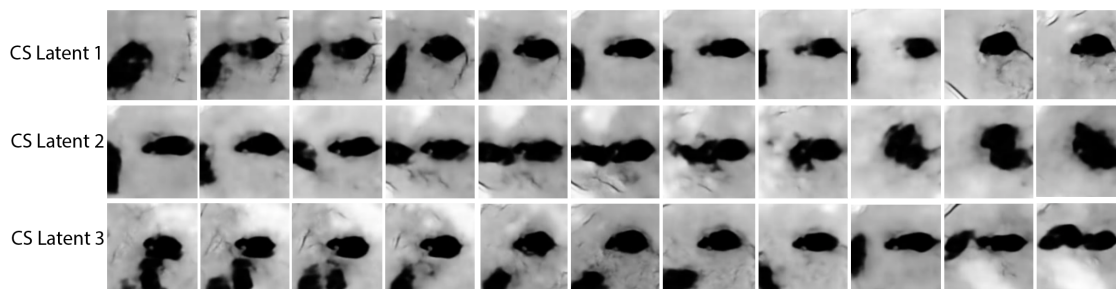

Figure 3: Latent traversals on the CS-latents for the freely-moving social behavior dataset. We see that the latents all encode for social interactions between the two mice.

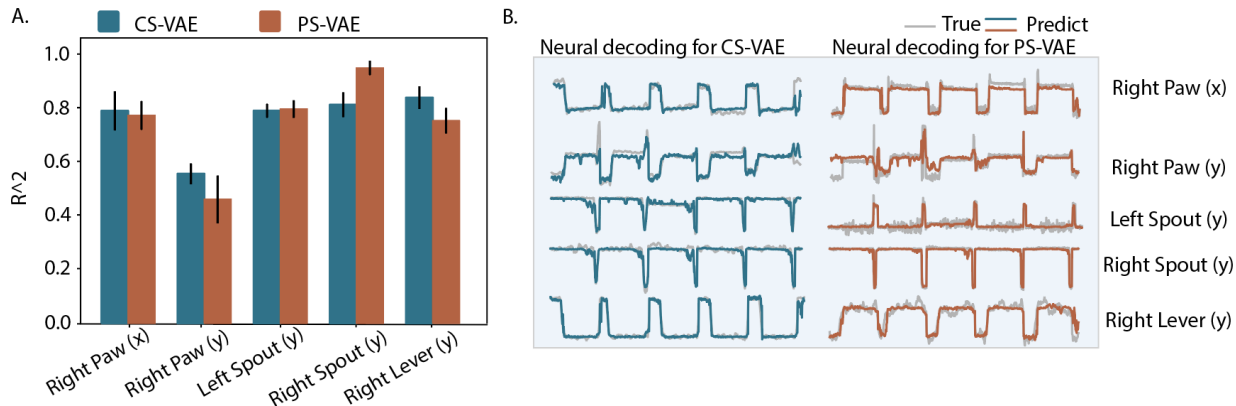

Figure 4: Neural decoding for CS-VAE vs. PS-VAE.

Table 3: Training size vs  $R^2$  value for multi-subject dataset

| Training size | Linear model      | Dense model       | LSTM model        | Transfer learning model |
|---------------|-------------------|-------------------|-------------------|-------------------------|
| 67712         | $0.476 \pm 0.048$ | $0.580 \pm 0.058$ | $0.610 \pm 0.054$ | $0.590 \pm 0.050$       |
| 58512         | $0.478 \pm 0.014$ | $0.560 \pm 0.023$ | $0.595 \pm 0.022$ | $0.579 \pm 0.019$       |
| 49312         | $0.483 \pm 0.009$ | $0.556 \pm 0.014$ | $0.593 \pm 0.013$ | $0.576 \pm 0.011$       |
| 40112         | $0.476 \pm 0.013$ | $0.543 \pm 0.019$ | $0.576 \pm 0.019$ | $0.562 \pm 0.015$       |
| 30912         | $0.470 \pm 0.011$ | $0.529 \pm 0.015$ | $0.559 \pm 0.018$ | $0.552 \pm 0.013$       |
| 21712         | $0.458 \pm 0.010$ | $0.496 \pm 0.016$ | $0.524 \pm 0.017$ | $0.522 \pm 0.013$       |
| 12512         | $0.424 \pm 0.012$ | $0.461 \pm 0.019$ | $0.480 \pm 0.025$ | $0.485 \pm 0.018$       |
| 3312          | $0.269 \pm 0.030$ | $0.321 \pm 0.048$ | $0.325 \pm 0.057$ | $0.345 \pm 0.043$       |

- 179 [2] Whiteway, M. R. et al. Partitioning variability in animal behavioral videos using semi-supervised variational  
180 autoencoders. bioRxiv (2021).
- 181 [3] Linderman, S. et al. Bayesian Learning and Inference in Re- current Switching Linear Dynamical Systems.  
182 In Singh, A. Zhu, J. (eds.) Proceedings of the 20th International Conference on Artificial Intelligence and  
183 Statistics, vol. 54 of Proceedings of Machine Learning Research, 914–922 (PMLR, 2017).

Table 4: Training size vs time usage for multi-subject dataset

| Training size | Linear model      | Dense model         | LSTM model          | Transfer learning model |
|---------------|-------------------|---------------------|---------------------|-------------------------|
| 67712         | $1.442 \pm 0.282$ | $115.946 \pm 1.559$ | $169.801 \pm 5.961$ | $169.482 \pm 5.041$     |
| 58512         | $1.130 \pm 0.212$ | $80.428 \pm 1.586$  | $146.734 \pm 5.063$ | $151.771 \pm 4.162$     |
| 49312         | $0.937 \pm 0.194$ | $68.879 \pm 1.257$  | $122.500 \pm 2.283$ | $125.240 \pm 4.479$     |
| 40112         | $0.679 \pm 0.114$ | $56.449 \pm 1.119$  | $100.336 \pm 2.212$ | $102.923 \pm 3.391$     |
| 30912         | $0.484 \pm 0.079$ | $44.427 \pm 0.808$  | $78.850 \pm 1.771$  | $79.907 \pm 2.608$      |
| 21712         | $0.309 \pm 0.050$ | $31.968 \pm 0.574$  | $57.670 \pm 1.681$  | $56.032 \pm 1.549$      |
| 12512         | $0.162 \pm 0.008$ | $19.573 \pm 0.369$  | $35.557 \pm 1.050$  | $33.409 \pm 0.741$      |
| 3312          | $0.104 \pm 0.034$ | $7.292 \pm 0.092$   | $13.318 \pm 0.342$  | $11.365 \pm 0.336$      |
